# Supplementary material for: Biomineralization of PbS and PbS–CdS core–shell nanocrystals and their application in quantum dot sensitized solar cells
Source: Royal Society of Chemistry journal article supplement (doi:10.1039/c5ta10534j), 2016-01-01
Supplement: c5ta10534j1.pdf [file c5ta10534j1.pdf]

## Supplementary Information

### Biom mineralization of PbS and PbS-CdS Core-Shell Nanocrystals and their Application in Quantum Dot Sensitized Solar Cells

Leah C. Spangler<sup>a</sup>, Li Lu<sup>b</sup>, Christopher J. Kiely<sup>a,b</sup>, Bryan W. Berger<sup>a,c\*</sup>, Steven McIntosh<sup>a\*</sup>

#### Contents:

**Figure S1:** Sequence of the cystathionine  $\gamma$ -lyase derived from electrospray ionization mass spectrometry.

**Figure S2:** Photoluminescence characteristics of PbS-CdS core-shell nanoparticles as a function of shell growth time.

**Figure S3:** HAADF-STEM image of an intentionally grown PbS-CdS core-shell nanocrystal and a pure CdS nanocrystal resulting from a secondary nucleation event.

**Table 1:** Lattice fitting of PbS nanocrystals shown in Figure 4 a) & c) and 4 b) & d) to the rock salt PbS structure.

**Table 2:** Lattice fitting of PbS-CdS nanocrystals shown in Figure 6 b) and 6 c) to the rock salt PbS structure.

MSNATSQDRA LALATLAIHG GQSPDPSTGA VMPPIYATST YAQSSPGEHQ GFEYSRTHNP  
TRFAYERCVA SLEGGTRGFA FASGMAASST VIELLDAGSH VVAMDDIYGG SFRLFERVRR  
RTAGLDFSFV DLTDLAAFEA SITPKTKMVW IETPTNPMLK IVDIAAVAAI AKRHGLIVVV  
DNTFASPMLQ RPLELGADLV LHSATKYLNG HSDMVGGMVV VGDNAELAEQ MAFLQNSVGG  
VQGPFD SFLA LRGLKTLPLR MKAHCANALA LAQWLEKHPA VEKVIYPGLA SHPQHELAKG  
QMAGYGGIVS IVLKGGFDA KRFCEKTELF TLAESLGGVE SLVNHPAVMT HASIPVARRE  
QLGISDALVR LSVGVEDLGD LQVDLGEALK

**Figure S1:** Sequence of the cystathionine  $\gamma$ -lyase that was derived from electrospray ionization mass spectrometry of a PbS QD solution synthesized using the *Stenotrophomonas maltophilia* strain SMCD1 (NCBI accession number WP\_012509966). The QD containing supernatant was dialyzed against distilled water to reduce the free Pb salt and L-cysteine concentration, lyophilized and analyzed by electrospray ionization mass spectrometry (ESI-MS).

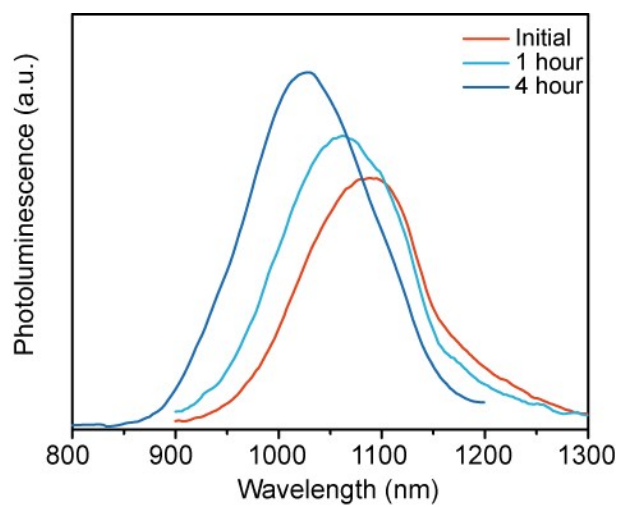

**Figure S2:** Photoluminescence characteristics of PbS-CdS core-shell nanoparticles, demonstrating a clear blue-shift as a function of the time that the PbS seed particles are in contact in the solution containing the Cd-precursor.

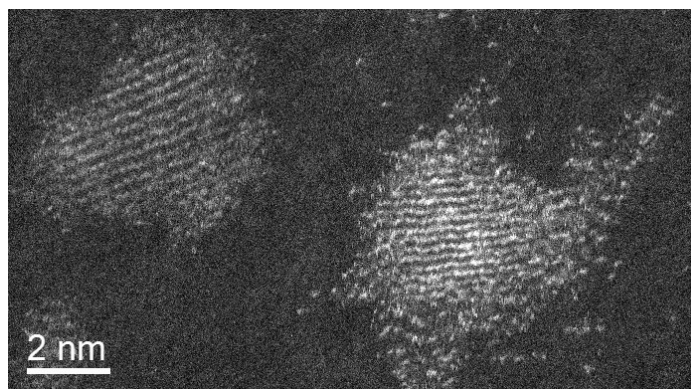

**Figure S3.** HAADF-STEM image of an intentionally grown PbS-CdS core-shell nanocrystal (*right*) and a pure CdS nanocrystal resulting from a secondary nucleation event (*left*).

**Table S1.** Lattice fitting of PbS nanocrystals shown in Figure 4 a) & c) and 4 b) & d) to the rock salt PbS structure.  $\langle x,y \rangle$  denotes the angle between two intersecting planes x and y. Planes are identified in Figure 4 c).

| Nanocrystal Identification as cubic PbS |             |                        |                                        |             |                        |
|-----------------------------------------|-------------|------------------------|----------------------------------------|-------------|------------------------|
| Figure 4a,c): $[1\bar{1}2]$ projection  |             |                        | Figure 4b,d): $[1\bar{1}0]$ projection |             |                        |
|                                         | Measurement | Matching               |                                        | Measurement | Matching               |
| Plane 1                                 | d=1.79 Å    | 1.91 Å (311)           | Plane 1                                | d=3.43 Å    | 3.49 Å (111)           |
| Plane 2                                 | d=2.10 Å    | 2.11 Å (220)           | Plane 2                                | d=2.10 Å    | 2.13 Å (220)           |
| Plane 3                                 | d=3.43 Å    | 3.53 Å ( $1\bar{1}1$ ) | Plane 3                                | d=3.43 Å    | 3.57 Å ( $11\bar{1}$ ) |
| $\langle 1, 2 \rangle$                  | 31.5°       | 32.2°                  | $\langle 1, 2 \rangle$                 | 35.3°       | 36.0°                  |
| $\langle 1, 3 \rangle$                  | 58.5°       | 57.9°                  | $\langle 1, 3 \rangle$                 | 70.5°       | 71.9°                  |
| $\langle 2, 3 \rangle$                  | 90.0°       | 89.9°                  | $\langle 2, 3 \rangle$                 | 35.3°       | 35.9°                  |

**Table S2** Lattice fitting of PbS-CdS nanocrystals shown in Figure 6 b) and 6 c) to the rock salt PbS structure.  $\langle x,y \rangle$  denotes the angle between two intersecting planes x and y. Planes are identified in Figure 6 c).

| Nanocrystal identification as cubic PbS |             |                        |
|-----------------------------------------|-------------|------------------------|
| Figure 6(c): [031] projection           |             |                        |
|                                         | Measurement | Matching               |
| Plane 1                                 | d=1.79 Å    | 1.76 Å ( $11\bar{3}$ ) |
| Plane 2                                 | d=1.79 Å    | 1.77 Å ( $1\bar{1}3$ ) |
| Plane 3                                 | d=2.97 Å    | 2.98 Å (200)           |
| $\langle 1, 2 \rangle$                  | 31.5°       | 32.2°                  |
| $\langle 1, 3 \rangle$                  | 58.5°       | 57.9°                  |
| $\langle 2, 3 \rangle$                  | 90.0°       | 89.9°                  |
